# Supplementary material
Source: bioRxiv or medRxiv preprint supplement (https://www.biorxiv.org/highwire/filestream/13750/field_highwire_adjunct_files/2/050328-3.pdf)
Supplement: Supplementary file [file 050328-3.pdf]

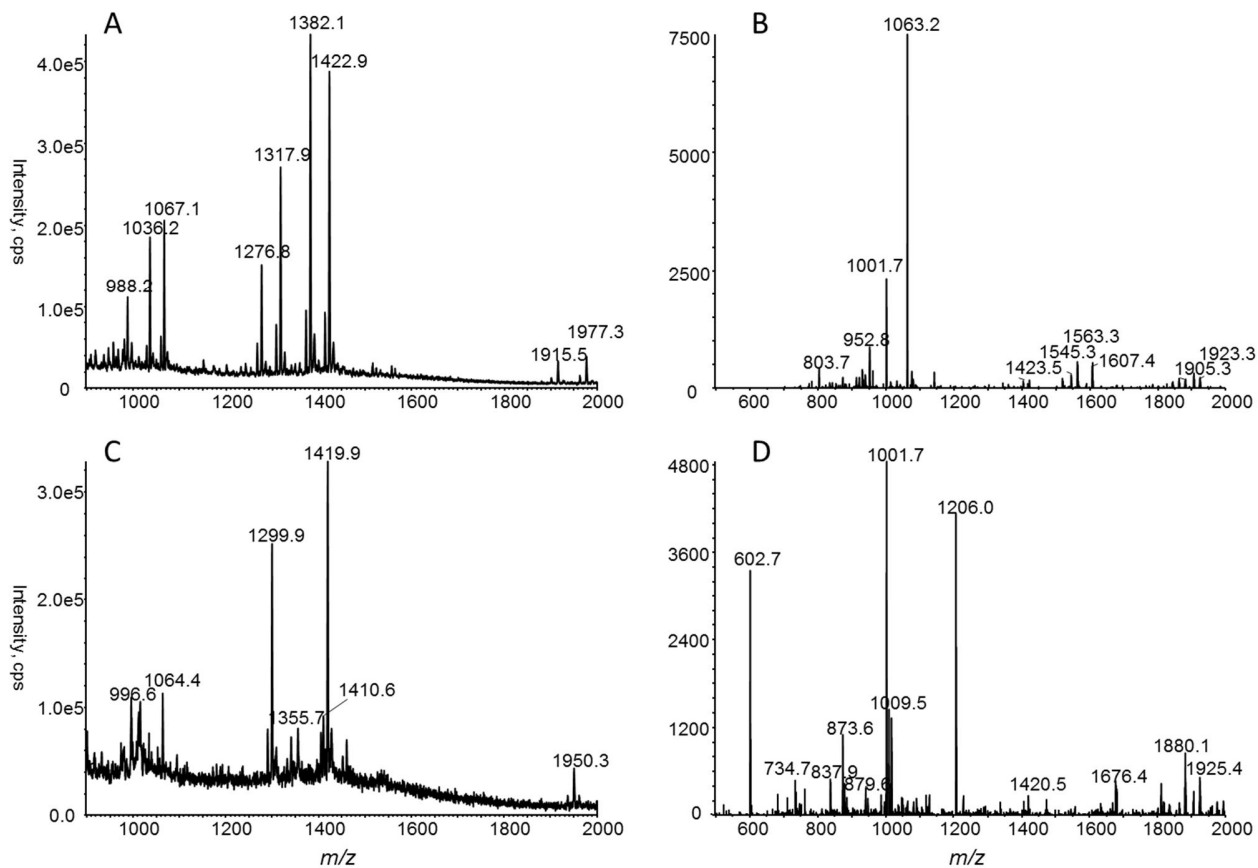

**Supplemental Figure 1.** Example of the electrophoresis-assisted open-tubular liquid chromatography electrospray mass spectrometry (EA-OTLC-MS) analysis of intact LOS from *C. coli*. (A) extracted mass spectrum for strain #137; (B) extracted MS/MS spectrum for precursor ion at  $m/z$  1422.9; (C) extracted mass spectrum for strain #65; (D) extracted MS/MS spectrum for precursor ion at  $m/z$  1299.9.
